# Supplementary material for: Stimulation of TLR4 by LMW-HA Induces Metastasis in Human Papillary Thyroid Carcinoma through CXCR7
Source: Hindawi journal article supplement (doi:10.1155/2013/712561), 2013-01-01
Supplement: f1 [file 712561.f1.pdf]

# Supplemental Figure

## A

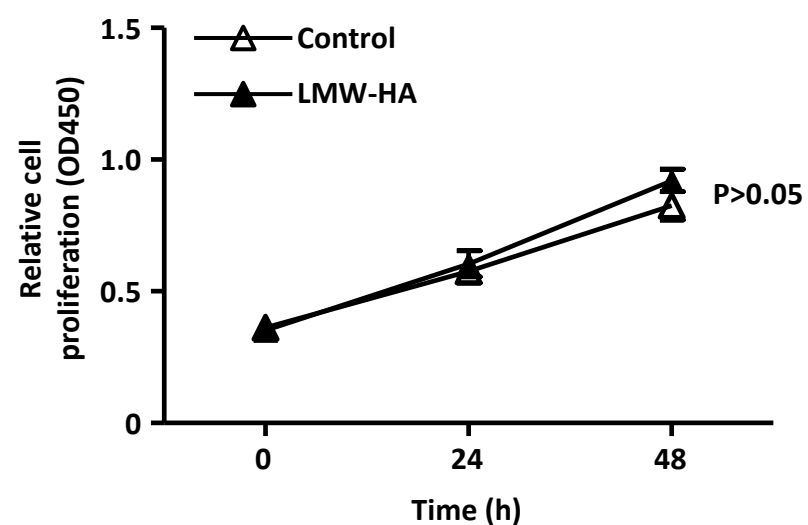

## B

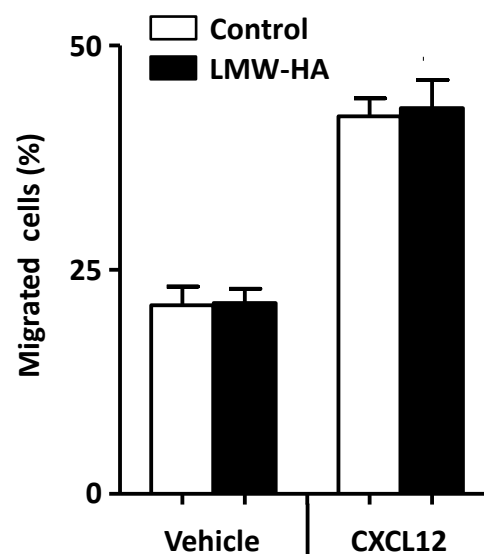

## C

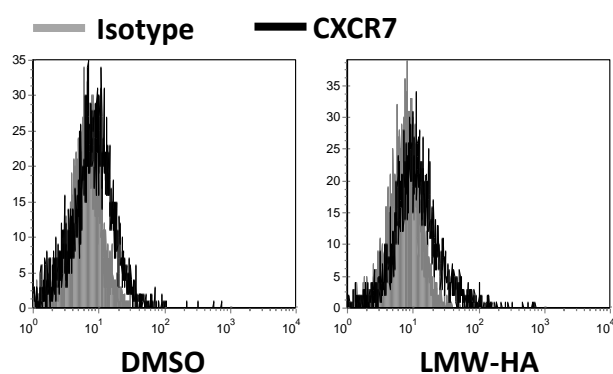

LMW-HA has no effect on K1 cell proliferation and migration. (A) K1 cells were seeded into 96 well plates (2,000 cells/well) and treated with or without LMW-HA. Cell proliferation was analyzed with WST-1 Kit. Data are mean  $\pm$  SEM for three independent experiments. (B) K1 cells were seeded into the upper chambers of transwell inserts treated with or without LMW-HA, and in the presence or absence of CXCL12 in the lower chambers. Migrated cells were determined. Data are mean  $\pm$  SEM for three independent experiments. (C) K1 cells were incubated with LMW-HA (100  $\mu$ g/ml) for 24 h, representative flow cytometric analysis of CXCR7 expression was shown.
